# Supplementary material
Source: publisher figshare collection journal article supplement (https://gsapubs.figshare.com/ndownloader/files/22758407)

## Supplementary Information

Figure of AFM data:

AFM topographic map of the surface of the band of gold nanoparticles, with transects across two individual 100 nm nanoparticles marked; 1. measured thickness of 6 nm, 2. measured thickness of 9 nm

## Supplementary information

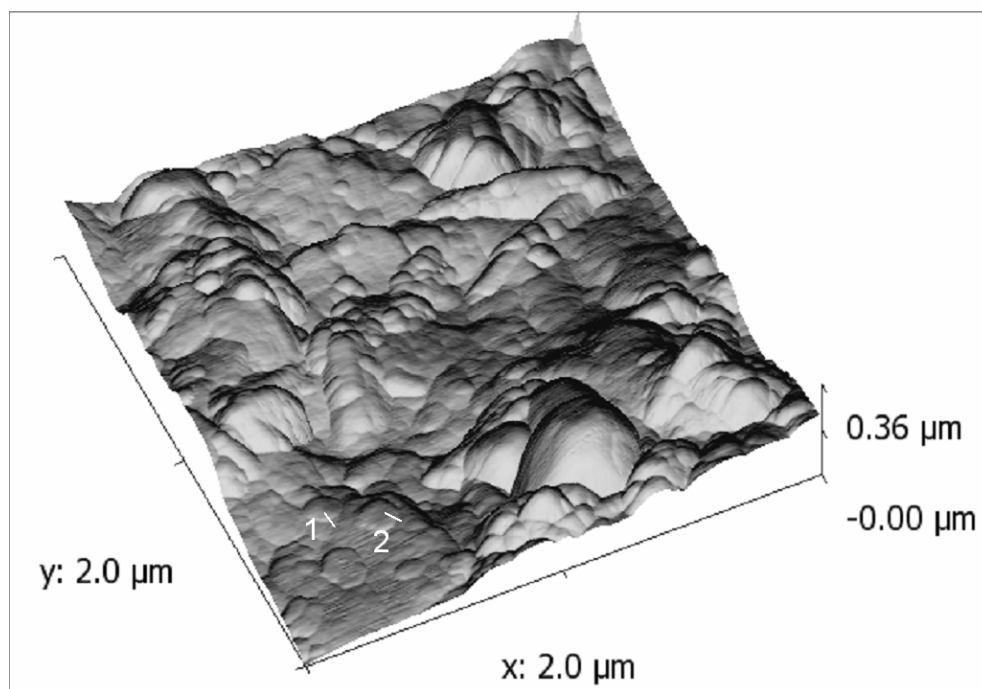

Supplement: Supplementary file 1 [file 22758407]
